# Supplementary material for: Superconductivity in transparent amorphous indium tin oxide films deposited by RF magnetron sputtering
Source: Research Square preprint supplement (doi:10.21203/rs.3.rs-6972225/v1), 2025-07-24
Supplement: Supplementary file 1 [file 860c111c61f93521c5e958b3.docx]

Superconductivity in transparent amorphous indium tin oxide films deposited by RF magnetron sputtering

Kang Wang,1 Xinzuo Sun,1 Chunyan Song,1 Chao Zhang,2 Ranran Li,3 and Xijun Li1,3,*

1. Westlake Center for Digitalized Manufacturing Technology of Integrated Circuits, College of Engineering, Westlake University, Hangzhou 310030, Zhejiang Province, China
2. Instrumentation and Service Center for Physical Sciences, Westlake University, Hangzhou 310030, Zhejiang Province, China
3. Westlake Center for Micro/Nano Fabrication at Westlake University, Westlake University, Hangzhou 310030, Zhejiang Province, China

***Author to whom correspondence should be addressed:** [lixijun@westlake.edu.cn](mailto:lixijun@westlake.edu.cn)

**Contents**

1. **Note I: Analyses of the superconducting fluctuation**
2. **Note Ⅱ: Magnetic conductance in perpendicular field and theoretical fitting on HLN model**
3. **Note Ⅲ: The calculation of mean free path and Fermi wavelength of S1 and S2**
4. **Supplementary Figures**
5. **Note Ⅰ: Analyses of the superconducting fluctuation**

**1.1 A self-consistent method for extracting upper critical fields (*μ*0*H*c2)**

Step 1: The zero-field resistance curve *R*(*H* = 0, *T*) near the superconducting transition is fitted using the two-dimensional Aslamazov-Larkin (2D AL) theory.1,2 This allows determination of the mean-field critical temperature *T*c, corresponding to the onset of Cooper pairing in the absence of fluctuations, as predicted by BCS theory. The fitting result is shown in Fig. S2.

Step 2: From the original measured *R*(*H* = 0, *T*) dataset, the resistance value at *T* = *T*c, denoted *R*(*H* = 0, *T*c), is determined by interpolation.

Step 3: The upper critical field *μ*0*H*c2(*T*) is then defined as the magnetic field at which the resistance of the sample equals *R*(*H* = 0, *T*c) for all *T* < *T*c. This criterion ensures consistency with the fluctuation-corrected normal-state behavior and provides a self-consistent method for determining *μ*0*H*c2(*T*).

**1.2 Fitting resistance using two-dimensional Aslamazov-Larkin (AL) theory**

In a two-dimensional disordered superconductor, superconducting fluctuations above *T*c lead to an excess contribution to the sheet conductance. The Aslamazov-Larkin theory describes this effect in the Gaussian fluctuation regime. In the 2D limit, the fluctuation-induced sheet conductance is given by:

where .1

To model the total resistance above *T*c, we use the following empirical expression derived from the fluctuation contribution:

Here, *R*n is the normal-state resistance, and *t*0 is a dimensionless fitting parameter characterizing the magnitude of excess sheet conductance from superconducting fluctuations. In the fitting procedure, we assume that the temperature window near the superconducting transition is sufficiently narrow such that the normal-state resistance *R*n can be treated as a temperature-independent constant. Additionally, the Maki–Thompson (MT) correction to the fluctuation conductivity is neglected.3,4 The MT term, arising from quantum interference effects between normal electrons and fluctuating Cooper pairs, becomes suppressed near *T*c due to the rapid decrease in the phase coherence length *l*φ. This assumption is further supported by prior studies indicating negligible MT correction in similar disordered 2D systems near the transition.5,6

The fit to the experimental *R*(*T*) data above *T*c is shown in Fig. S2, yielding the parameters *R*n = 314.79 ± 0.01 Ω, *t*0 = 0.00159 ± 2.5×10−5, and *T*c = 1.478 ± 0.002 K. Based on these parameters, the experimentally extracted pre-factor for the fluctuation-induced sheet conductance is . This value is in excellent agreement with the theoretical prediction of the 2D Aslamazov–Larkin theory, , confirming both the validity of the 2D fluctuation model and the soundness of the approximations employed.

**2 Note Ⅱ: Magnetic conductance in perpendicular field and theoretical fitting on HLN model**

**2.1 Fitting range for HLN analysis**

In the analysis of weak localization (WL) or weak antilocalization (WAL) using the Hikami–Larkin–Nagaoka (HLN) theory,7 the choice of fitting range in magnetic field is critical to extract physically meaningful parameters such as the number of quantum interference channels, phase coherence length *l*φ, and spin-orbit scattering length *l*SO. To ensure the validity of the HLN model—where quantum interference dominates and Landau quantization is negligible—the fitting field range should typically remain below the characteristic dephasing field . Preliminary fitting indicates that a magnetic field up to ~ 2 T is appropriate for our samples (e.g., *l*φ~20 nm), and the fitting range should be further reduced at lower temperatures as *l*φ increases.

For sample S1, we performed fits over both 1.5 T and 3 T ranges. The extracted values of *l*φ and *β* remained consistent within error margins, indicating robustness against the fitting window. In contrast, sample S2 exhibits stronger disorder, leading to shorter *l*φ and a smaller valid fitting range. Comparing fits over 0.6 T, 1 T, and 1.5 T confirms that field ranges within 1 T yield consistent *β* and *l*φ values. Based on this analysis, the final fitting ranges adopted in the main text are 3 T for S1 and 1 T for S2.

**2.2 Estimating spin-orbit coupling strength**

Fig. 4c and 4d show the temperature dependence of the fitted *β* factor and phase coherence length *l*φ for samples S1 and S2, respectively. In both samples, the extracted *β* values are below the theoretical limit of 1.7 This deviation is not attributable to effects such as Zeeman splitting or magnetic impurities. One potential explanation is the presence of moderate spin-orbit coupling (SOC), which breaks time-reversal symmetry and suppresses constructive interference, thereby reducing *β*.

To quantitatively assess SOC strength, we employ a generalized HLN formula that includes spin-dependent interference corrections:

where , . This expression, adapted from Iordanskii et al.,8 theoretically assumes *β* = 1, incorporating all spin-interference contributions. However, setting *β* = 1 yields poor fits, suggesting that the reduced *β* arises not from strong SOC but from partial localization of electronic states due to disorder,9–11 which effectively reduces the fraction of electrons participating in quantum interference. Allowing *β* to vary as a free parameter leads to excellent agreement with experimental data. The extracted *l*φ and *β* values remain consistent with those obtained from standard HLN fits, and the temperature dependence of the spin-orbit scattering length *l*SO is shown in Fig. S4.

Notably, we observe significantly longer *l*SO in amorphous ITO compared to polycrystalline films. This suggests suppression of SOC-induced spin relaxation in the amorphous structure. This behavior may be attributed to the absence of long-range lattice order in the amorphous phase, which leads to ill-defined crystal momentum and suppresses D’yakonov–Perel (DP) spin dephasing,12 as well as to the spatial localization of electronic states, which reduces the spin-flip scattering probability central to the Elliott–Yafet (EY) mechanism.12 Conversely, in polycrystalline ITO, grain boundary-induced inversion asymmetry, electric field gradients, and dislocation fields enhance local SOC, promoting spin precession and relaxation. The “momentum decoherence” and spatial disorder in amorphous systems collectively contribute to a longer *l*SO. Furthermore, both samples exhibit an exponential decrease in *l*SO with increasing temperature. This trend aligns with the spin–phonon relaxation model proposed by Xu et al. based on a first-principles Lindblad master equation.13 Their framework predicts rapid shortening of spin relaxation time with temperature due to enhanced phonon occupation and electron–phonon scattering. Given the relation , where is the spin relaxation time, this model naturally accounts for the observed *l*SO(*T*) behavior. Despite being developed for crystalline systems, the Lindblad formalism does not rely on Bloch state decomposition, making it applicable to amorphous or polycrystalline materials as well.

Overall, *l*SO serves as an effective measure of SOC-induced decoherence in transport. Smaller *l*SO values indicate stronger SOC-induced spin relaxation. Although *l*SO is influenced by multiple factors (e.g., diffusion constant, scattering rates), our data confirm that SOC-related spin relaxation is negligible in S1 and S2, consistent with values reported for disordered ITO in the literature.14,15

**2.3 Fitting data at 1.8 K and 4 K near *T*c**

As discussed previously, near the superconducting transition temperature, the enhanced conductance observed at zero magnetic field originates from superconducting fluctuations, which increase the probability of Cooper pairing even above *T*c. When a perpendicular magnetic field is applied, these fluctuations are rapidly suppressed, leading to a monotonic decrease in conductance with increasing field. To avoid conflating the contribution from superconducting fluctuations with that from quantum interference, we exclude the low-field regime from the HLN fitting. Instead, we restrict the fit to intermediate and high magnetic fields, where fluctuation effects are negligible and the conductance variation arises predominantly from weak localization. To account for the fluctuation-induced excess conductance at zero field, we include a constant offset term in the fitting function. The resulting fits, which isolate the WL contribution, yield reliable values of the phase coherence length and *β* factor, as shown in Fig. S5, and the extracted *β* and *l*φ values are summarized in Fig. 4(c) of the main text.

**3 Note Ⅲ: The calculation of mean free path and Fermi wavelength of S1 and S2**

In this work, the electron mean free path (*l*), is determined from the resistivity (*ρ*), carrier density (*n*), as

where is the Fermi wavelength, *e* is the electron charge and *h* is the Planck’s constant. The Fermi wavevector is given by . The carrier density was obtained from Hall data through standard four-probe method. The Fermi wavelength and mean free path *l* as functions of temperature from 300 to 1.8 K are shown in Fig. S7.

**References**

1. L. G. Aslamazov, A. I. Larkin, *Physics Letters* **26A**, 238 (1986).
2. M. A. Paalanen, A. F. Hebard, *Applied Physics Letters* **45,** 794 (1984).
3. K. Maki, *Progress of Theoretical Physics* **39**, 897 (1968).
4. R. S. Thompson, *Physical Review B* **1**, 327 (1970).
5. Myron Strongin, R. S. Thompson, O. F. Kammerer, J. E. Crow, *Physical Review B* **1**, 1078 (1970).
6. W. J. Skocpol, M. Tinkham, *Reports on Progress in Physics* **38**, 1049 (1975).
7. S. Hikami, A. I. Larkin, Y. Nagaoka, *Progress of Theoretical Physics* **63**, 707 (1980).
8. S. V. Iordanskii, Yu. B. Lyanda-Geller, G. E. Pikus, *ZhETF Pisma Redaktsiiu* **60**, 199 (1994).
9. P. W. Anderson, *Physical Review* **109**, 1492 (1958).
10. N. F. Mott, *Philosophical Magazine* **15**, 1259 (1968).
11. E. Abrahams, P. W. Anderson, D. C. Licciardello, T. V. Ramakrishnan, *Physical Review Letters* **42**, 673 (1979).
12. Igor Žutić, Jaroslav Fabian, S. Das Sarma, *Reviews of Modern Physics* **76**, 323 (2004).
13. J. Q. Xu, A. Habib, S. Kumar, F. Wu, R. Sundararaman, Y. Ping, *Nature Communications* **11**, 2780 (2020).
14. Z. Ovadyahu, *Physical Review B* **63**, 235403 (2001).
15. C.-Y. Wu, B.-T. Lin, Y.-J. Zhang, Z.-Q. Li, J.-J. Lin, *Physical Review B* **85**, 104204 (2012).

**4 Supplementary Figures**


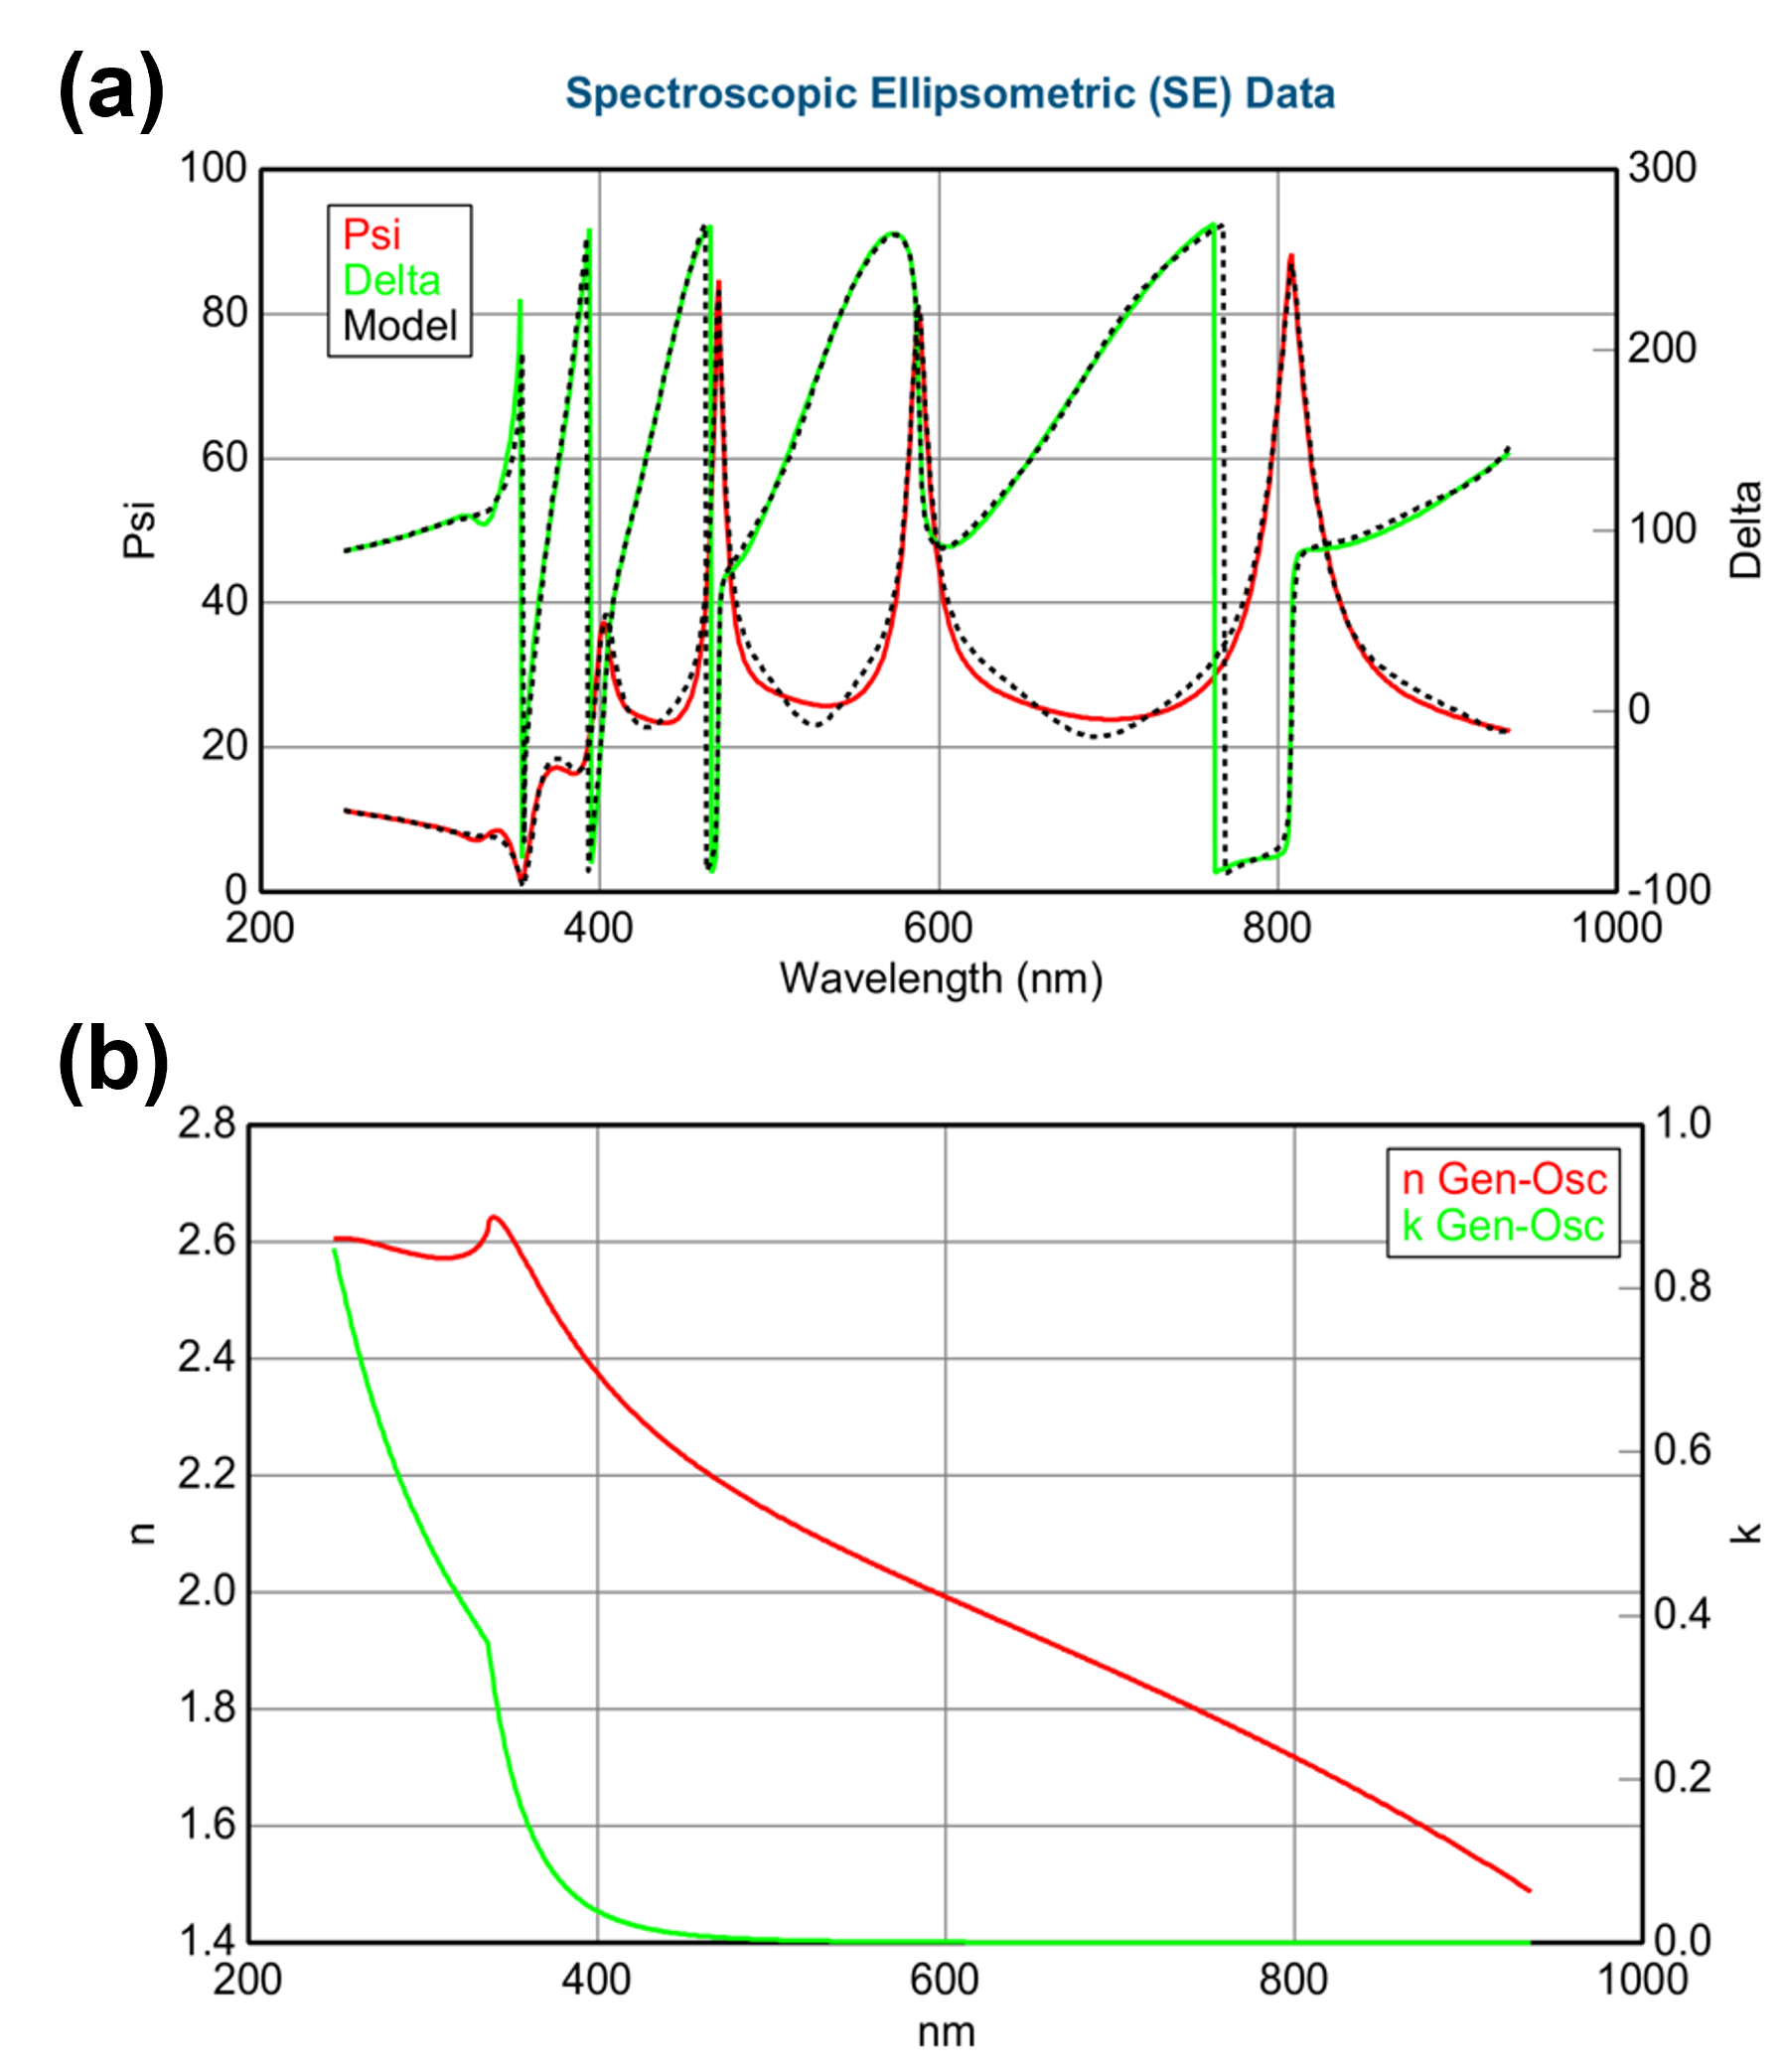


**Figure S1** Spectroscopic ellipsometry characterization of ITO film. a) Ellipsometric data and fitting curves over the 250–936 nm (1.32–4.96 eV). b) Refractive index and extinction coefficient of ITO extracted from (a). The obtained optical constants serve as reference for potential applications of ITO in optical waveguide media.


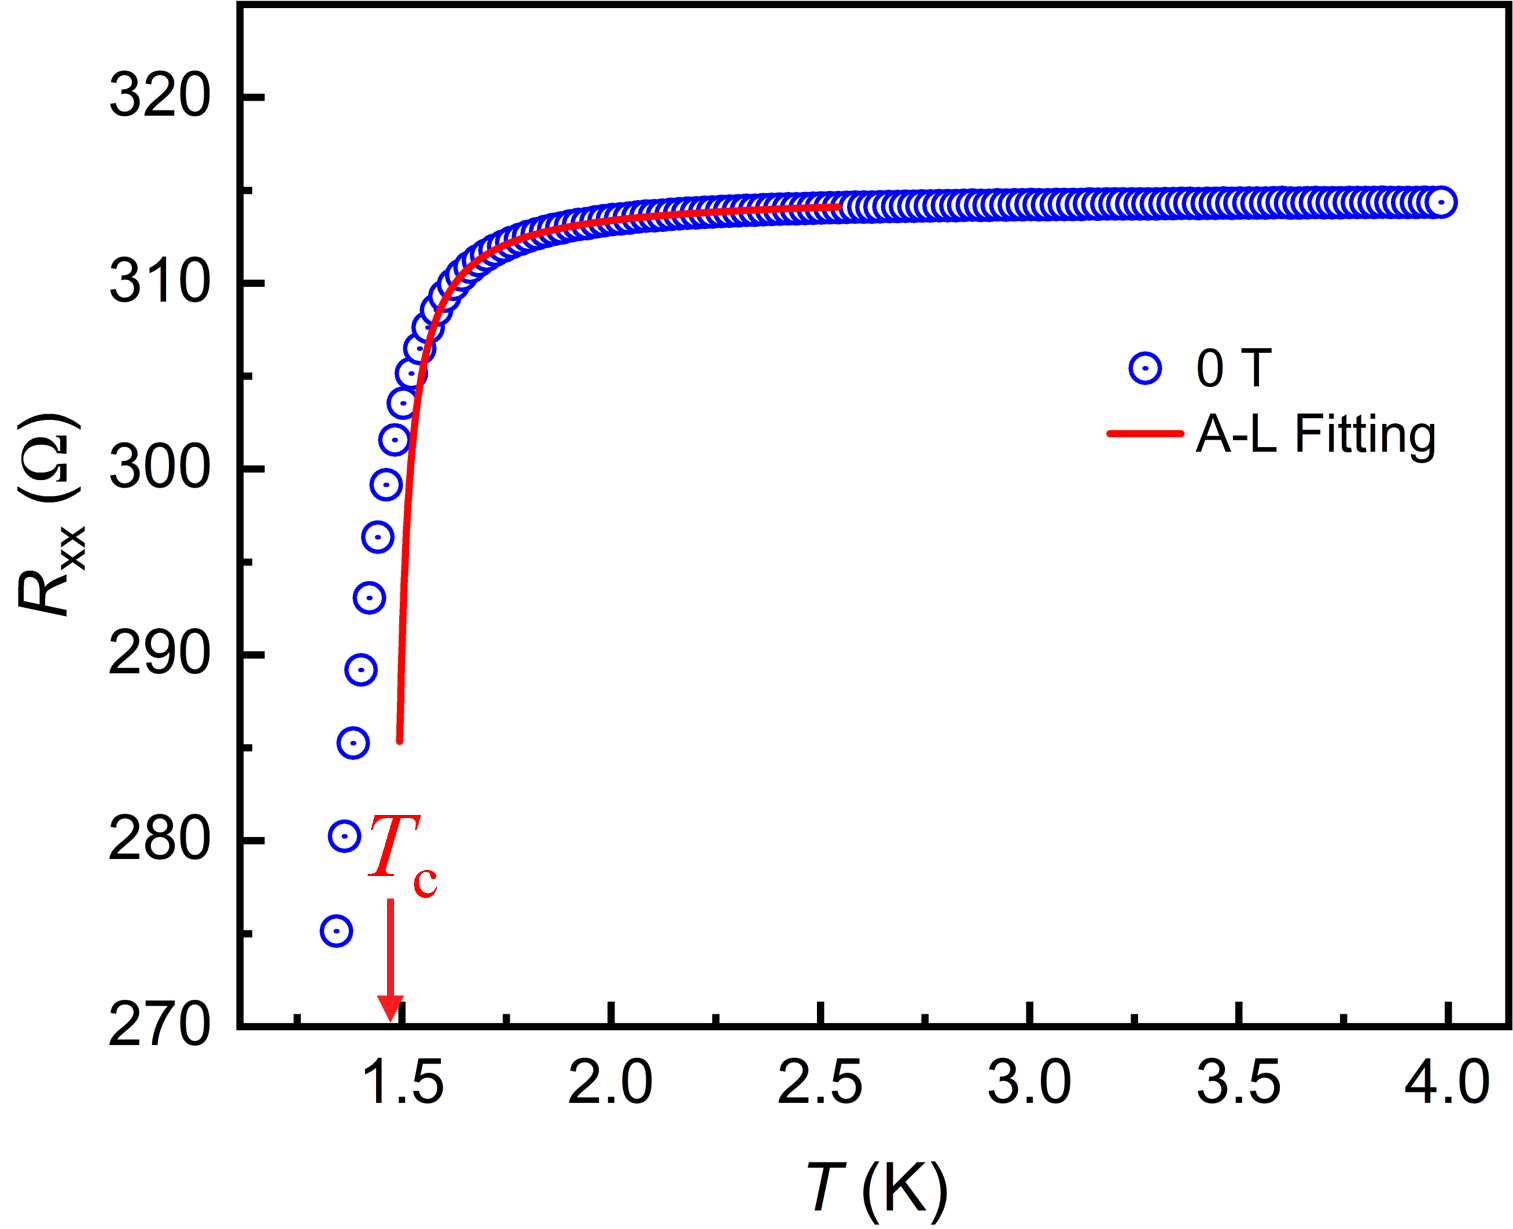


**Figure S2** Resistance transition of superconducting S1 sample, with Aslamazov-Larkin fit represented by the solid line. The extracted mean-field transition temperature *T*c is 1.478 ± 0.002 K.


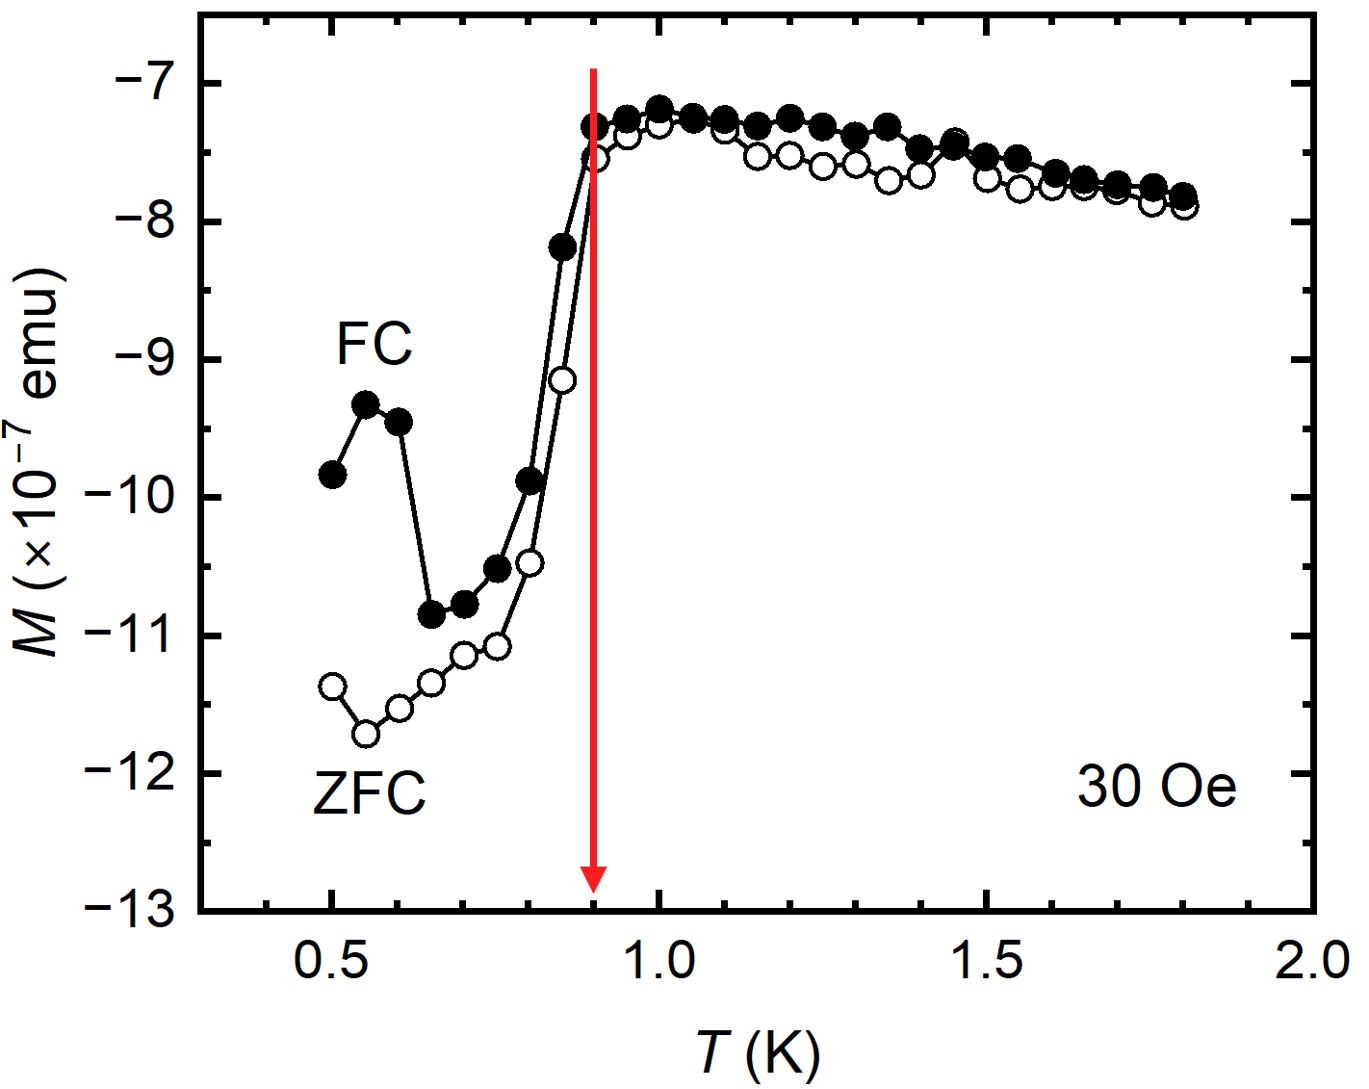


**Figure S3** Field cooled (FC) and zero field cooled (ZFC) magnetization measurements as a function of temperature of ITO thin film under an external constant magnetic field of 30 Oe.


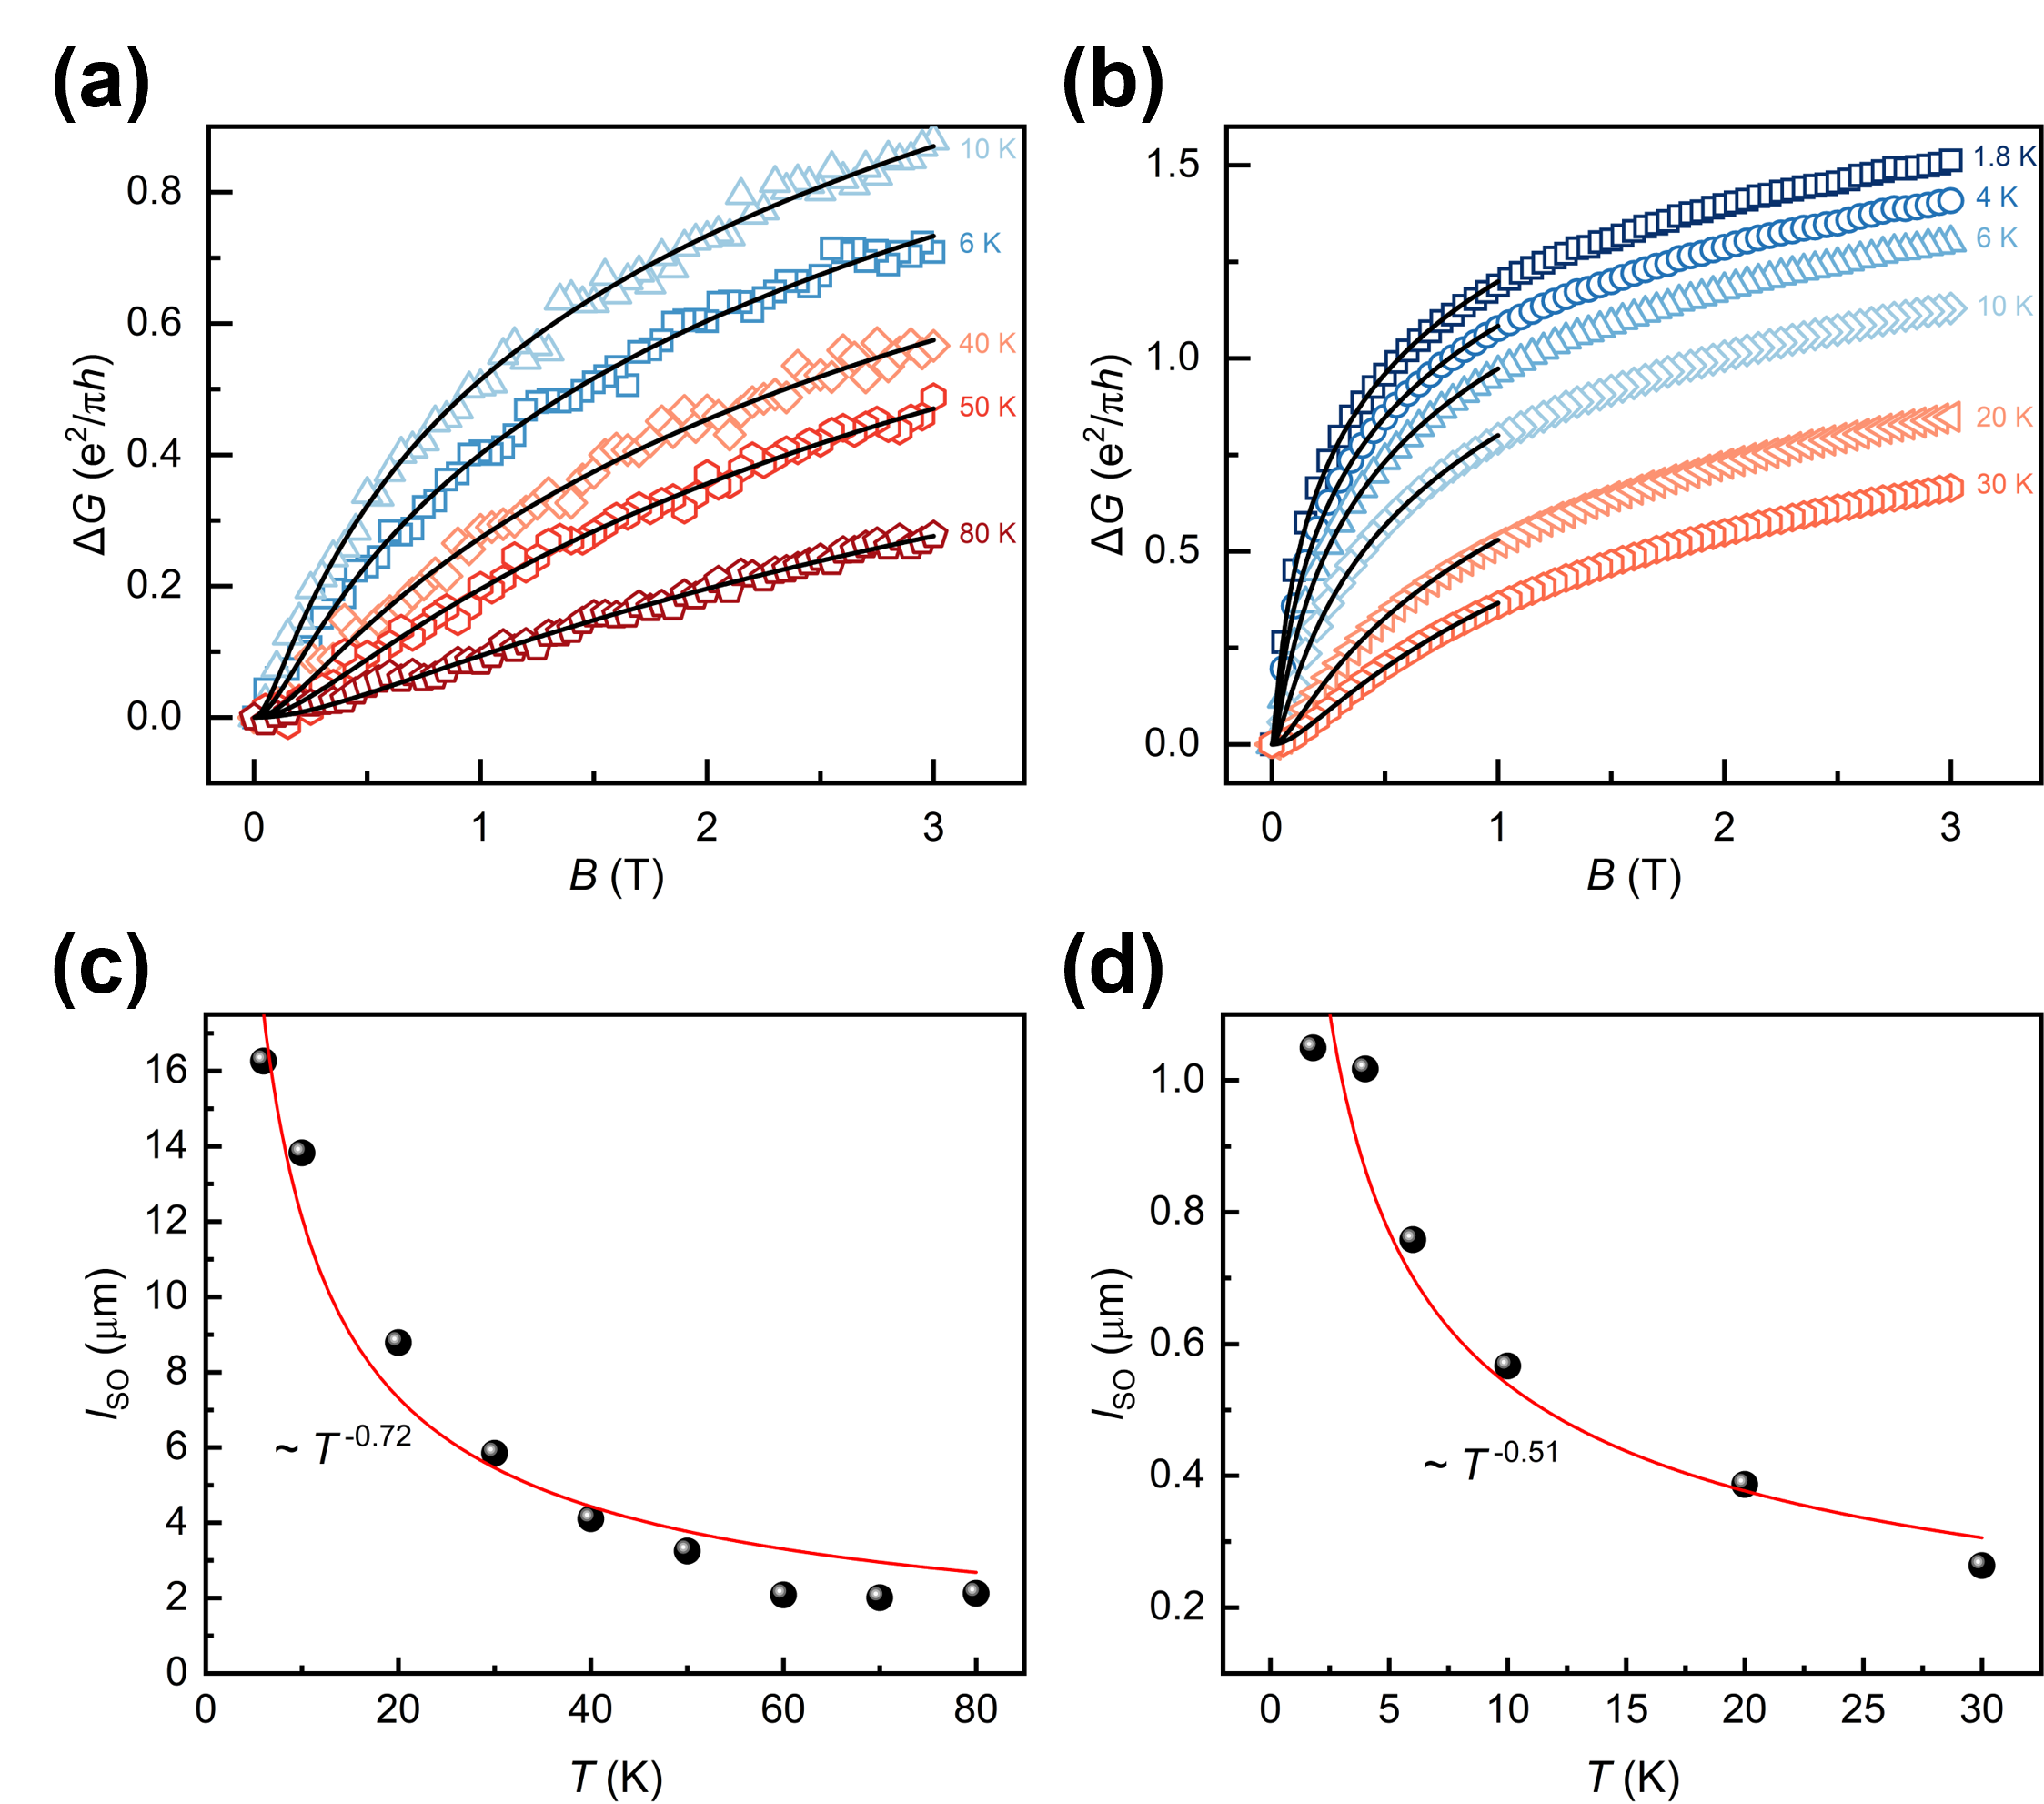


**Figure S4** Fitting of Δ*G* data using the modified Hikami-Larkin-Nagaoka (HLN) model to extract the spin-orbit scattering length. a, b) Magnetoconductance Δ*G* (open symbols) as a function of perpendicular magnetic field at various temperatures for sample S1 and S2, respectively. Solid lines represent the fits to the modified HLN formular. c, d) Temperature dependence of spin-orbit scattering length *l*SO, extracted from fits in (a) and (b). The red solid lines are fits to , with *p* = −0.72 ± 0.07 for S1 and −0.51 ± 0.07 for S2.


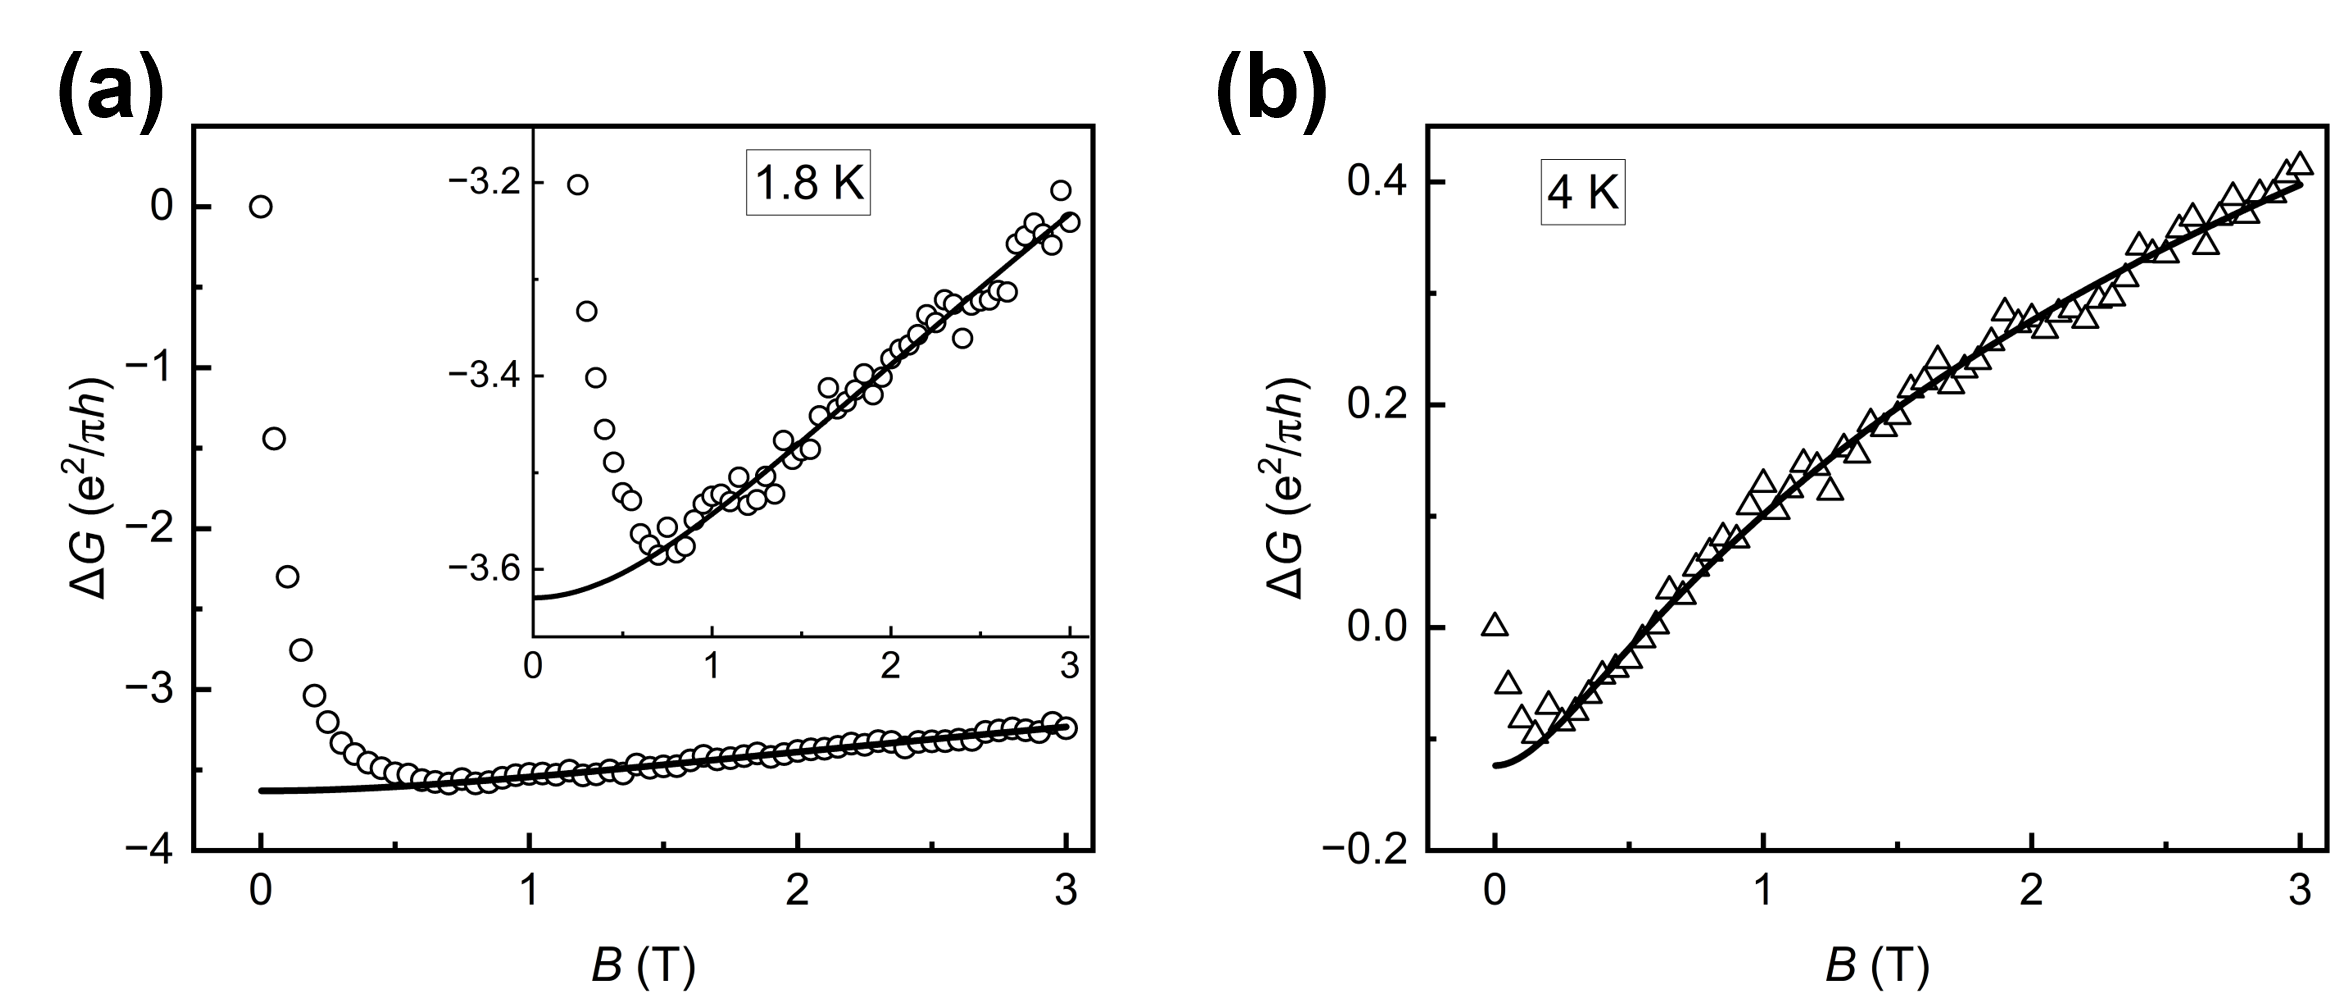


**Figure S5** a, b) Magnetoresistance data (open circles and triangles) of sample S1 measured at 1.8 K and 4 K, respectively, along with fits using the standard HLN formular (solid lines). The fitting function is based on equation (2) in the main text, with an additional constant offset term. The fitting range spans from the magnetic field at which Δ*G* reaches its minimum up to 3 T. The extracted fitting parameters *β* and the phase coherence length *l*φ are plotted in Fig. 4(c) of the main text.


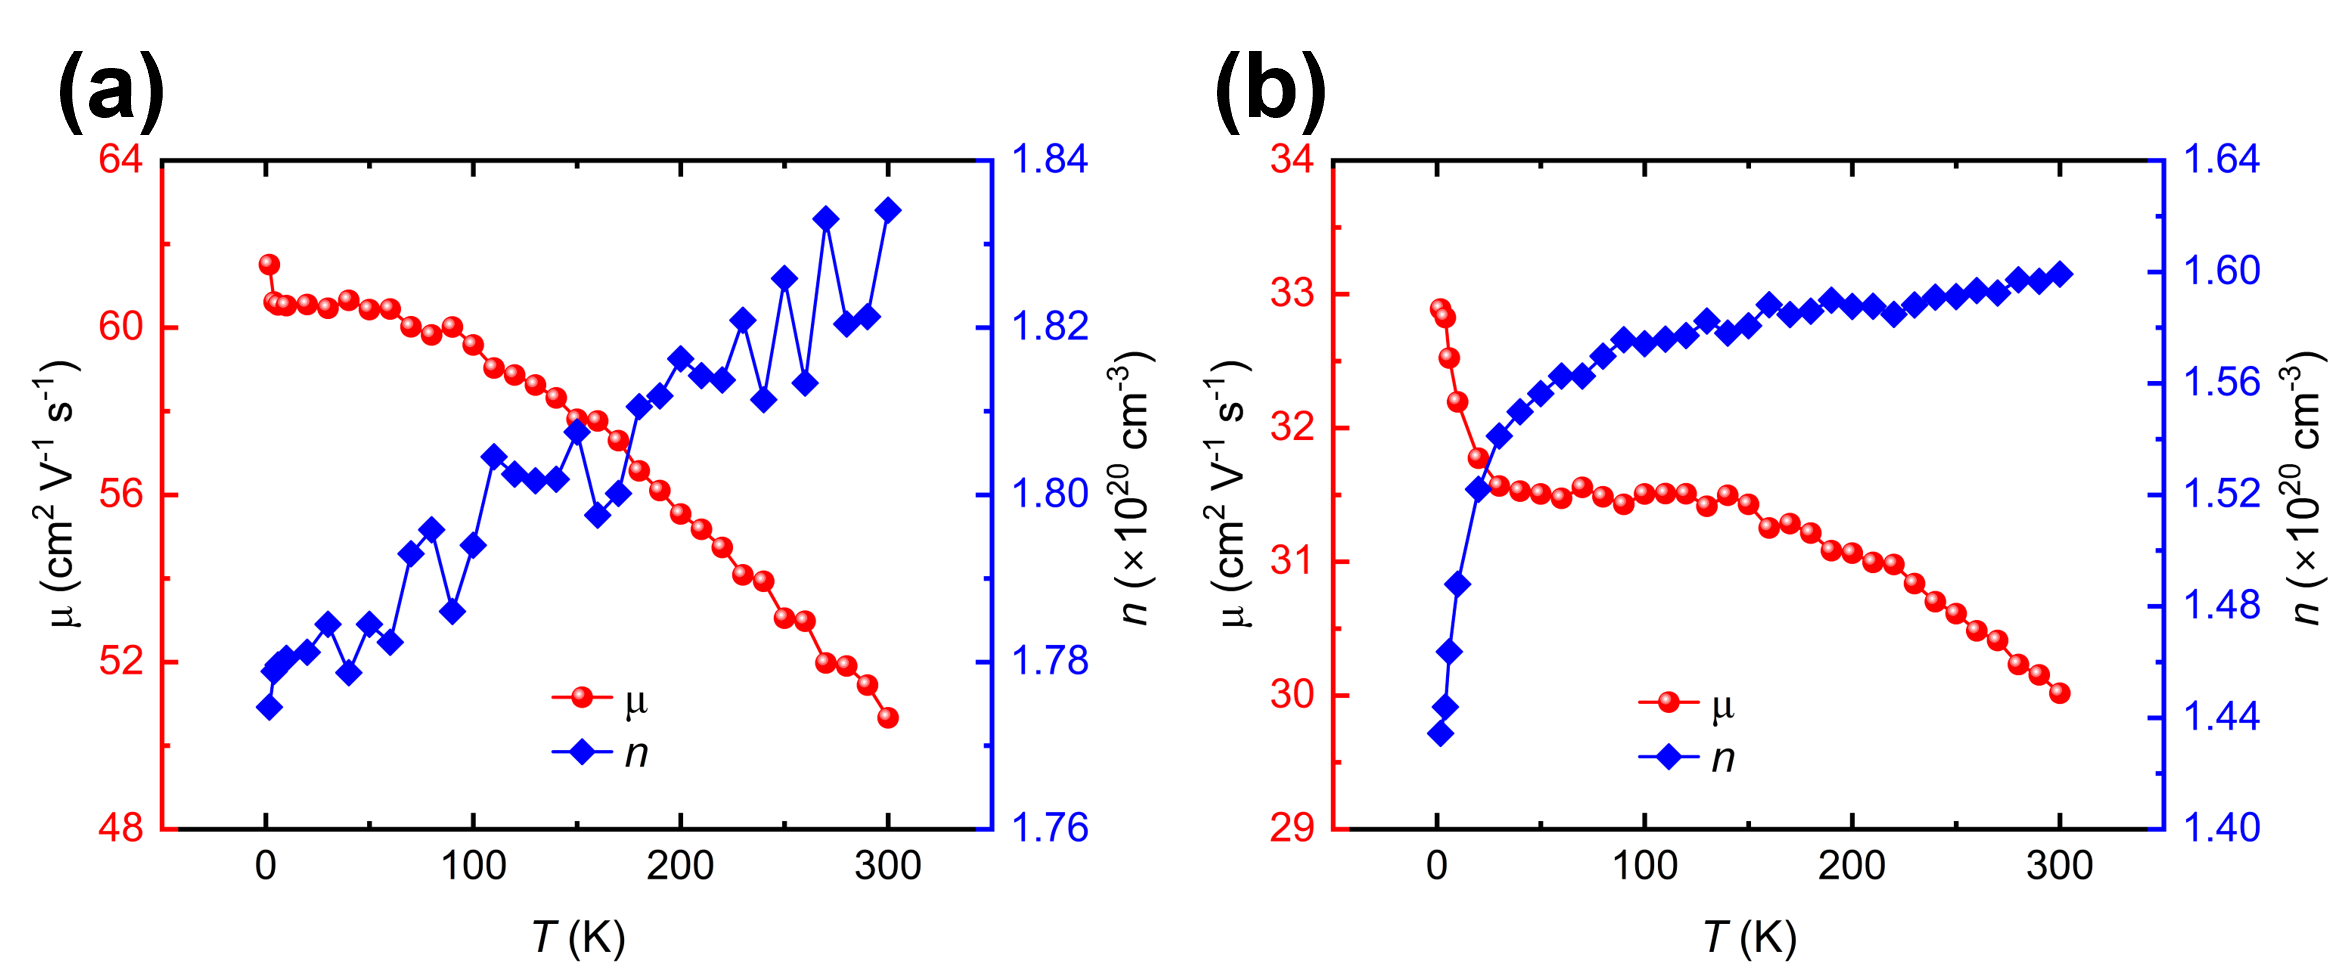


**Figure S6** a, b) Temperature dependence of carrier mobility and carrier density for samples S1 and S2, respectively. A standard six-terminal Hall bar geometry was used for transport measurements.


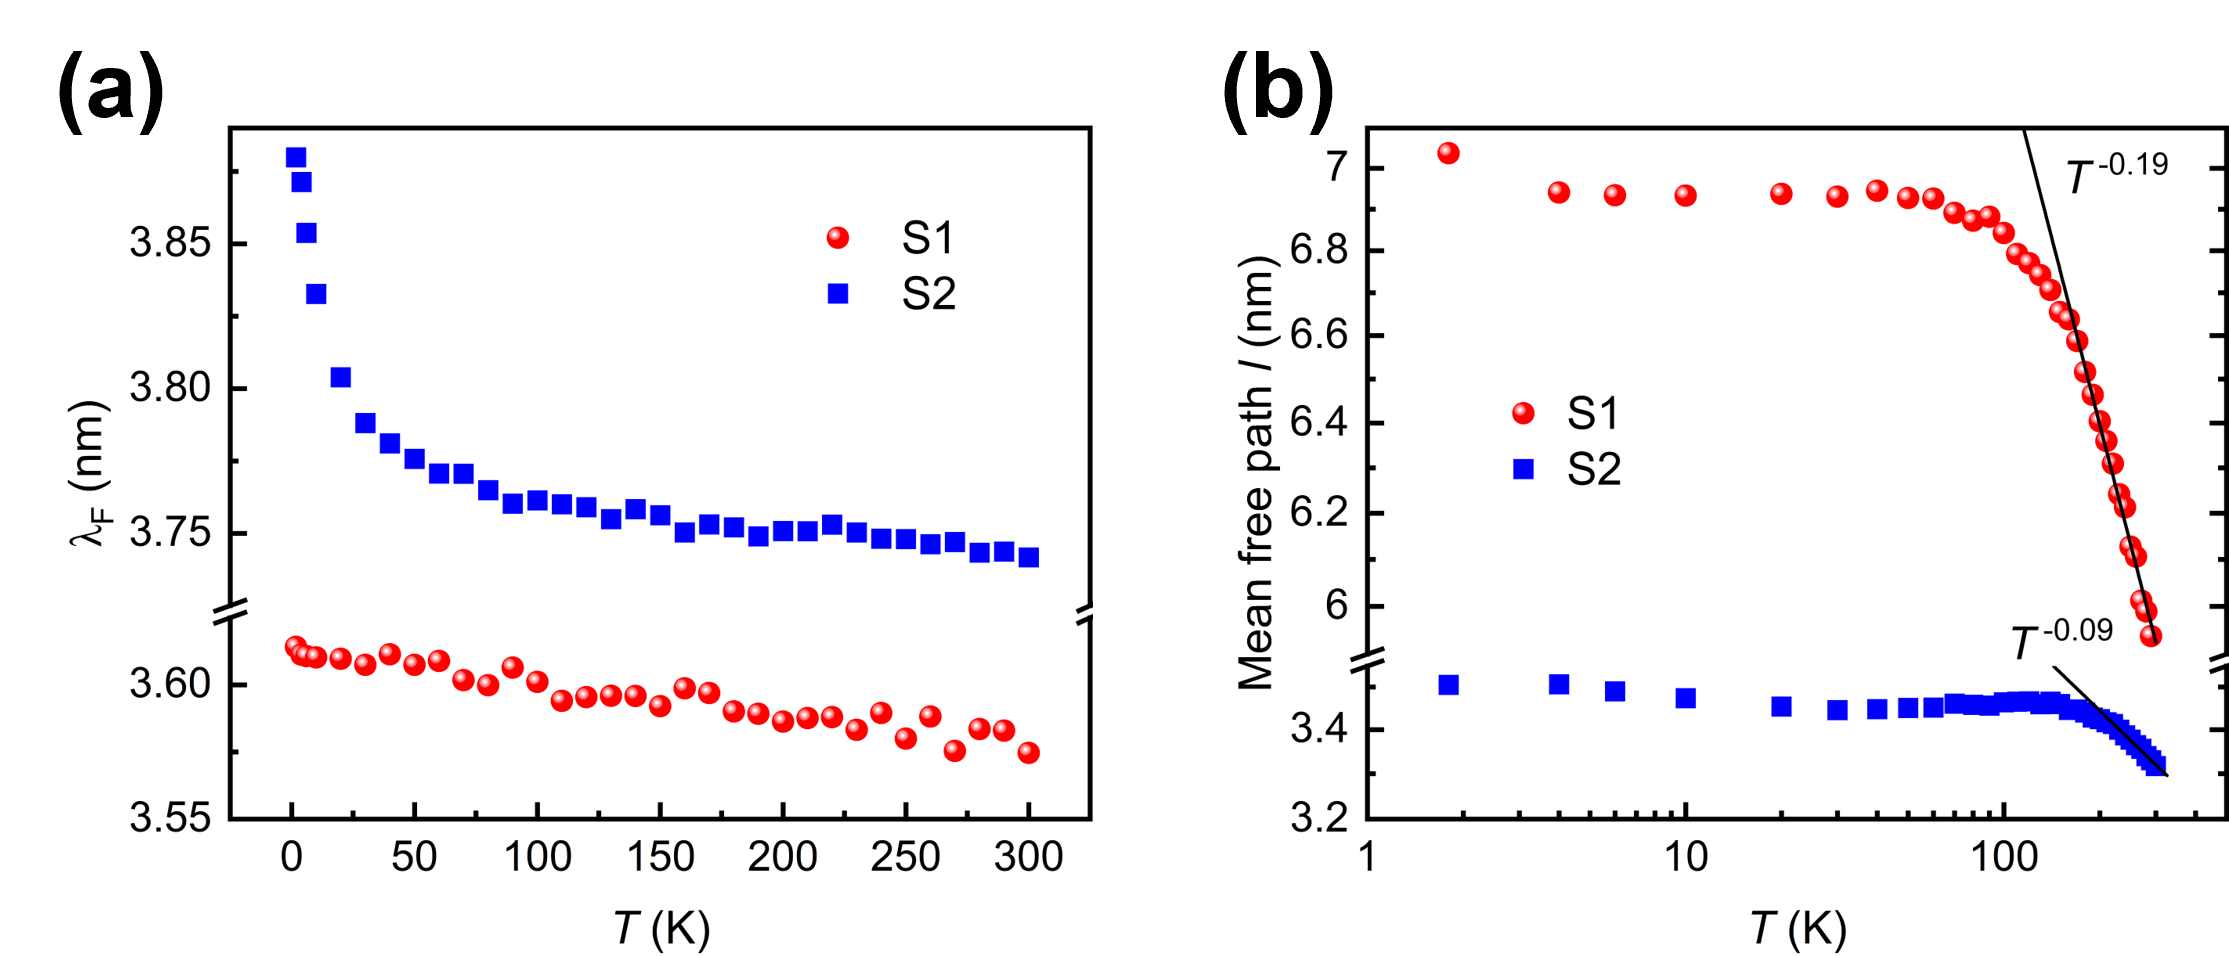


**Figure S7** a, b) Comparison of the Fermi wavelength and mean free path for S1 and S2, respectively.
